# Supplementary material
Source: PubMed Central journal article supplement (PMC10585586)
Supplement: jamadermatol-e233703-s001.pdf [file jamadermatol-e233703-s001.pdf]

## Supplementary Online Content

Massey PR, Wang DM, Murad F, et al. Extensive perineural invasion vs nerve caliber to assess cutaneous squamous cell carcinoma prognosis. *JAMA Dermatol*. Published online October 18, 2023. doi:10.1001/jamadermatol.2023.3703

**eTable 1.** Association Between Assessed Perineural Invasion (PNI) Factors of Interest and Brigham and Women’s Hospital (BWH) Risk Factors

**eTable 2.** Poor Outcomes by Assessed Perineural Invasion (PNI) Characteristic

**eTable 3.** Test Characteristics of Models Under Study to Detect Any Poor Outcome

**eFigure.** Example of Perineural Invasion in at Least 3 Distinct Nerves of a Hematoxylin and Eosin–Stained Mohs Section

This supplementary material has been provided by the authors to give readers additional information about their work.

**eTable 1.** Association Between Assessed Perineural Invasion (PNI) Factors of Interest and Brigham and Women’s Hospital (BWH) Risk Factors

|                      | Tumor diameter <2cm | Tumor diameter ≥2cm | P value     | Tumor depth dermis or fat | Tumor depth beyond fat | P value    | Tumor differentiation well/moderate | Tumor differentiation poor | P value | PNI <0.1mm | PNI ≥0.1mm | P value         |
|----------------------|---------------------|---------------------|-------------|---------------------------|------------------------|------------|-------------------------------------|----------------------------|---------|------------|------------|-----------------|
| N=                   | 69                  | 59                  |             | 99                        | 38                     |            | 90                                  | 47                         |         | 66         | 74         |                 |
| <b>PNI extent</b>    |                     |                     |             |                           |                        |            |                                     |                            |         |            |            |                 |
| Focal                | 44 (62%)            | 27 (38%)            | .21         | 60 (79%)                  | 16 (21%)               | <b>.04</b> | 53 (70%)                            | 23 (30%)                   | .16     | 47 (61%)   | 30 (39%)   | <b>&lt;.001</b> |
| Moderate             | 13 (35%)            | 24 (65%)            |             | 27 (66%)                  | 14 (34%)               |            | 26 (63%)                            | 15 (37%)                   |         | 15 (35%)   | 28 (65%)   |                 |
| Extensive            | 11 (58%)            | 8 (42%)             |             | 11 (58%)                  | 8 (42%)                |            | 10 (53%)                            | 9 (47%)                    |         | 3 (16%)    | 16 (84%)   |                 |
| <b>PNI location</b>  |                     |                     |             |                           |                        |            |                                     |                            |         |            |            |                 |
| Intratumoral         | 7 (29%)             | 17 (71%)            | .41         | 19 (70%)                  | 8 (30%)                | .69        | 16 (59%)                            | 11 (41%)                   | .55     | 10 (37%)   | 17 (63%)   | .17             |
| Advancing edge       | 28 (74%)            | 10 (26%)            |             | 31 (84%)                  | 6 (16%)                |            | 27 (73%)                            | 10 (27%)                   |         | 31 (79%)   | 8 (21%)    |                 |
| Extratumoral         | 23 (48%)            | 25 (52%)            |             | 39 (70%)                  | 17 (30%)               |            | 38 (68%)                            | 18 (32%)                   |         | 18 (32%)   | 38 (68%)   |                 |
| <b>Nerve caliber</b> |                     |                     |             |                           |                        |            |                                     |                            |         |            |            |                 |
| <0.1mm               | 43 (69%)            | 19 (31%)            | <b>.001</b> | 50 (78%)                  | 14 (22%)               | .15        | 41 (64%)                            | 23 (36%)                   | .71     |            |            |                 |
| ≥0.1mm               | 26 (39%)            | 40 (61%)            |             | 49 (67%)                  | 24 (33%)               |            | 49 (67%)                            | 24 (33%)                   |         |            |            |                 |
| <b>PNI depth</b>     |                     |                     |             |                           |                        |            |                                     |                            |         |            |            |                 |
| Dermis               | 36 (60%)            | 24 (40%)            | .20         | 52 (83%)                  | 11 (17%)               | <b>.01</b> | 43 (68%)                            | 20 (32%)                   | .56     | 43 (66%)   | 22 (34%)   | <b>&lt;.001</b> |
| Beyond dermis        | 33 (49%)            | 35 (51%)            |             | 47 (64%)                  | 27 (36%)               |            | 47 (64%)                            | 27 (36%)                   |         | 23 (31%)   | 52 (69%)   |                 |

P values based on nonparametric test for trend.

PNI, perineural invasion. BWH, Brigham and Women’s Hospital.

**eTable 2.** Poor Outcomes by Assessed Perineural Invasion (PNI) Characteristic

|                      | Local recurrence |         | P value     | Any metastasis (NM/DM) |         | P value | Disease specific death |         | P value    | Any poor outcomes (LR/NM/DM/DSD) |          | P value     |
|----------------------|------------------|---------|-------------|------------------------|---------|---------|------------------------|---------|------------|----------------------------------|----------|-------------|
|                      | No               | Yes     |             | No                     | Yes     |         | No                     | Yes     |            | No                               | Yes      |             |
| <b>N=</b>            | 128              | 12      |             | 130                    | 10      |         | 129                    | 11      |            | 123                              | 17       |             |
| <b>PNI extent</b>    |                  |         |             |                        |         |         |                        |         |            |                                  |          |             |
| Focal                | 74 (96%)         | 3 (4%)  | <b>.003</b> | 73 (95%)               | 4 (5%)  | .32     | 73 (95%)               | 4 (5%)  | <b>.05</b> | 72 (94%)                         | 5 (6%)   | <b>.001</b> |
| Moderate             | 39 (91%)         | 4 (9%)  |             | 39 (91%)               | 4 (9%)  |         | 40 (93%)               | 3 (7%)  |            | 38 (88%)                         | 5 (12%)  |             |
| Extensive            | 14 (74%)         | 5 (26%) |             | 17 (89%)               | 2 (11%) |         | 15 (79%)               | 4 (21%) |            | 12 (63%)                         | 7 (37%)  |             |
| <b>PNI location</b>  |                  |         |             |                        |         |         |                        |         |            |                                  |          |             |
| Intratumoral         | 25 (93%)         | 2 (7%)  | .81         | 26 (96%)               | 1 (4%)  | .71     | 26 (96%)               | 1 (4%)  | .80        | 25 (93%)                         | 2 (7%)   | .95         |
| Advancing edge       | 34 (87%)         | 5 (13%) |             | 35 (90%)               | 4 (10%) |         | 34 (87%)               | 5 (13%) |            | 31 (79%)                         | 8 (21%)  |             |
| Extratumoral         | 52 (93%)         | 4 (7%)  |             | 52 (93%)               | 4 (7%)  |         | 52 (93%)               | 4 (7%)  |            | 50 (89%)                         | 6 (11%)  |             |
| <b>Nerve caliber</b> |                  |         |             |                        |         |         |                        |         |            |                                  |          |             |
| <0.1mm               | 61 (92%)         | 5 (8%)  | .69         | 62 (94%)               | 4 (6%)  | .64     | 63 (95%)               | 3 (5%)  | .17        | 60 (91%)                         | 6 (9%)   | .30         |
| ≥0.1mm               | 67 (91%)         | 7 (9%)  |             | 68 (92%)               | 6 (8%)  |         | 66 (89%)               | 8 (11%) |            | 63 (85%)                         | 11 (15%) |             |
| <b>PNI depth</b>     |                  |         |             |                        |         |         |                        |         |            |                                  |          |             |
| Dermis               | 59 (91%)         | 6 (9%)  | .80         | 59 (91%)               | 6 (9%)  | .37     | 60 (92%)               | 5 (8%)  | .95        | 56 (86%)                         | 9 (14%)  | .57         |
| Beyond dermis        | 69 (92%)         | 6 (8%)  |             | 71 (95%)               | 4 (5%)  |         | 69 (92%)               | 6 (8%)  |            | 67 (89%)                         | 8 (11%)  |             |

P values based on nonparametric test for trend.

PNI, perineural invasion; NM, nodal metastasis; DM, distant metastasis; LR, local recurrence; DSD, disease specific death.

**eTable 3.** Test Characteristics of Models Under Study to Detect Any Poor Outcome

|                             | <b>Current BWH</b>      | <b>BWH with ePNI<br/>in lieu of lcPNI</b> | <b>BWH with ePNI<br/>or lcPNI</b> |
|-----------------------------|-------------------------|-------------------------------------------|-----------------------------------|
| <b>Sensitivity (95% CI)</b> | 0.706 (0.627,<br>0.785) | 0.692 (0.611,<br>0.774)                   | <b>0.769 (0.695,<br/>0.844)</b>   |
| <b>Specificity (95% CI)</b> | 0.455 (0.369,<br>0.541) | <b>0.682 (0.600,<br/>0.764)</b>           | 0.491 (0.403,<br>0.579)           |
| <b>PPV (95% CI)</b>         | 0.164 (0.100,<br>0.228) | <b>0.204 (0.133,<br/>0.276)</b>           | 0.152 (0.088,<br>0.215)           |
| <b>NPV (95% CI)</b>         | 0.911 (0.862,<br>0.960) | <b>0.949 (0.911,<br/>0.988)</b>           | 0.947 (0.908,<br>0.987)           |
| <b>AUC (95% CI)</b>         | 0.585 (0.468,<br>0.702) | <b>0.690 (0.562,<br/>0.817)</b>           | 0.644 (0.532,<br>0.757)           |

Bolded cells highlight best model for each characteristic. Sensitivity, specificity, PPV and NPV calculations performed by stratification of tumors into high (T2b/T3) and low (T2a/T1) BWH T stage.

BWH, Brigham and Women's Hospital; ePNI, extensive perineural invasion; lcPNI, large caliber perineural invasion; CI, confidence interval; PPV, positive predictive value; NPV, negative predictive value; AUC, area under the curve.

**eFigure.** Example of Perineural Invasion in at Least 3 Distinct Nerves of a Hematoxylin and Eosin–Stained Mohs Section

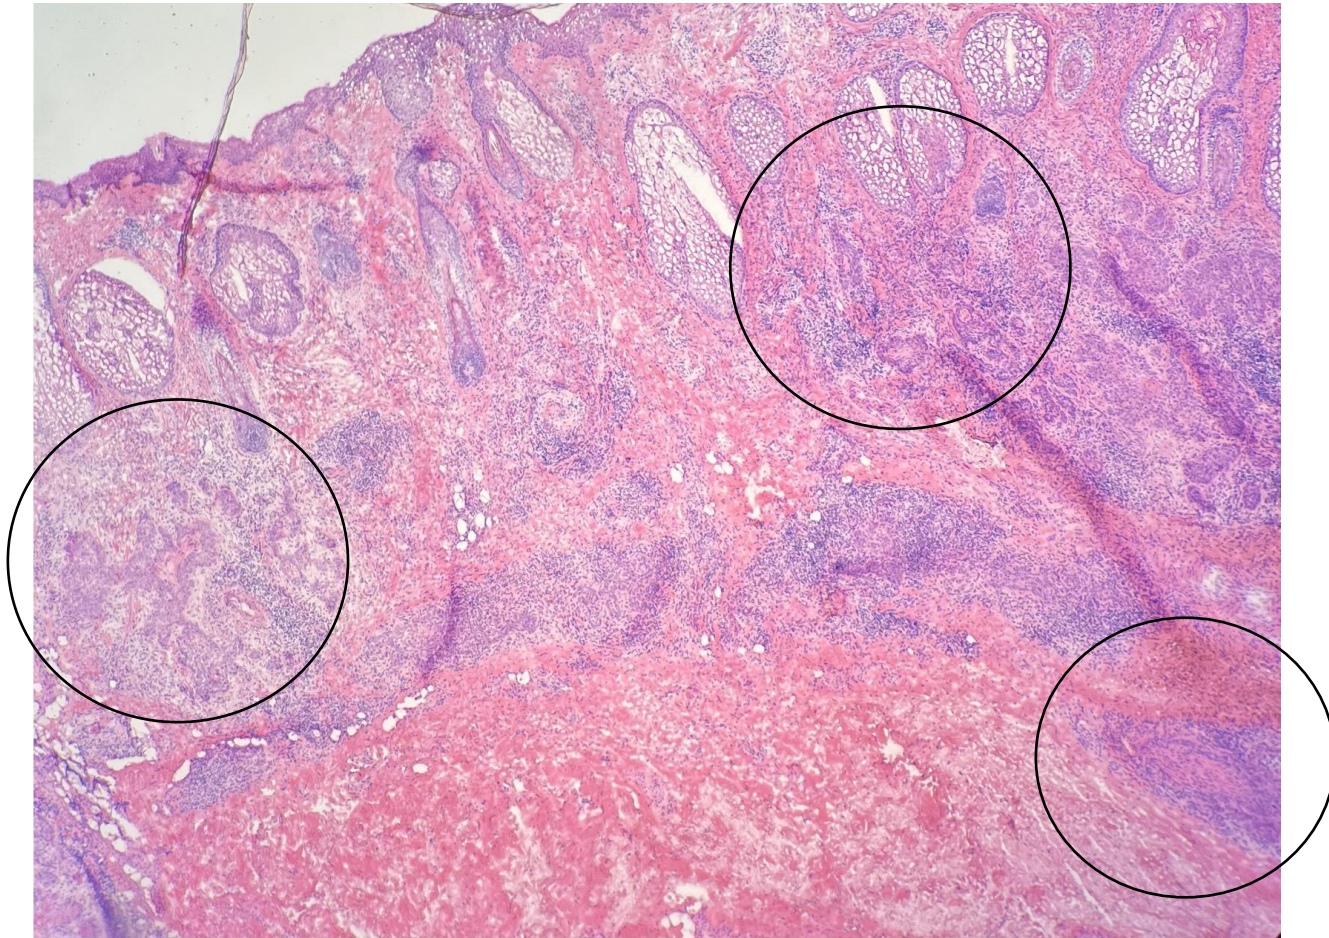

Circles represent distinct nerve foci. Note differences in nerve caliber and spatial orientation among foci (original magnification x40).
