# Supplementary material
Source: PubMed Central journal article supplement (PMC10585586)
Supplement: jamadermatol-e233703-s002.pdf [file jamadermatol-e233703-s002.pdf]

## Data Sharing Statement

Massey. Extensive Perineural Invasion vs Nerve Caliber to Assess Cutaneous Squamous Cell Carcinoma Prognosis. *JAMA Dermatol*. Published October 18, 2023.  
doi:10.1001/jamadermatol.2023.3703

### Data

**Data available:** No
